# Supplementary material
Source: PubMed Central journal article supplement (PMC2867690)
Supplement: 0910361107_pnas.200910361SI.pdf [file 0910361107_pnas.200910361SI.pdf]

# Supporting Information

Pulido and Berthold 10.1073/pnas.0910361107

**Table S1. Sample sizes and trait means of blackcaps collected in the wild**

| Year | $N_{\text{individuals}}$ | $N_{\text{families}}$ | Amount of MA | Onset of MA | Termination of MA |
|------|--------------------------|-----------------------|--------------|-------------|-------------------|
| 1988 | 50                       | 12                    | 1045 ± 376   | 256 ± 10    | 351 ± 15          |
| 1989 | 38                       | 9                     | 856 ± 314    | 258 ± 12    | 344 ± 10          |
| 1990 | 30                       | 7                     | 1074 ± 328   | 253 ± 10    | 340 ± 12          |
| 1991 | 20                       | 5                     | 853 ± 272    | 266 ± 8     | 346 ± 9           |
| 1992 | 48                       | 14                    | 887 ± 376    | 257 ± 10    | 341 ± 13          |
| 1994 | 45                       | 12                    | 685 ± 201    | 259 ± 12    | 348 ± 16          |
| 1995 | 59                       | 16                    | 630 ± 259    | 259 ± 11    | 342 ± 11          |
| 1996 | 54                       | 16                    | 584 ± 257    | 269 ± 19    | 351 ± 17          |
| 1997 | 47                       | 12                    | 681 ± 251    | 269 ± 15    | 354 ± 22          |
| 1998 | 49                       | 14                    | 670 ± 263    | 248 ± 13    | 344 ± 21          |
| 1999 | 95                       | 31                    | 671 ± 306    | 269 ± 16    | 348 ± 21          |
| 2000 | 146                      | 34                    | 568 ± 217    | 255 ± 15    | 347 ± 24          |
| 2001 | 75                       | 17                    | 667 ± 234    | 258 ± 12    | 353 ± 18          |

$N_{\text{individuals}}$  gives the number of collected nestlings.  $N_{\text{families}}$  gives the number of broods from which individuals were sampled. Means ± 1 SD were calculated from individual values. The amount of migratory activity (MA) is given in number of half-hour intervals with activity. Onset and termination of migratory activity are given in Julian dates.

**Table S2. General linear models predicting the temporal change in the amount of migratory activity from 1988 to 2001**

| Model | Factors                                     | df | AIC      | ΔAIC   | $r^2_{\text{adj}}$ |
|-------|---------------------------------------------|----|----------|--------|--------------------|
| 1     | Year, Year <sup>3</sup>                     | 2  | 2530.608 | 0      | 0.269              |
| 1     | Year, Year <sup>2</sup>                     | 2  | 2531.011 | 0.403  | 0.268              |
| 3     | Year <sup>2</sup> , Year <sup>3</sup>       | 2  | 2531.298 | 0.690  | 0.267              |
| 4     | Year, Year <sup>2</sup> , Year <sup>3</sup> | 3  | 2532.490 | 1.882  | 0.265              |
| 5     | Year                                        | 1  | 2535.817 | 5.209  | 0.252              |
| 6     | Year <sup>2</sup>                           | 1  | 2549.666 | 19.058 | 0.210              |
| 7     | Year <sup>3</sup>                           | 1  | 2561.129 | 30.521 | 0.172              |

Models were ranked in the order of decreasing fit. Models are based on family means ( $n = 199$ ).
